# Supplementary material for: Characterization of a second secologanin synthase isoform producing both secologanin and secoxyloganin allows enhanced de novo assembly of a Catharanthus roseus transcriptome
Source: BMC Genomics. 2015 Aug 19;16(1):619. doi: 10.1186/s12864-015-1678-y (PMC4541752; doi:10.1186/s12864-015-1678-y)
Supplement: Additional file 3: Table S1. — Details for each RNA-seq sample used in this study. [file 12864_2015_1678_MOESM3_ESM.xlsx]

## Sheet: Feuil1
Supplemental Table 1. Details for each RNA-seq sample used in this study
SRP	sample accession	run accession	title	cv	library name	library layout	instrument model	sample alias	description	Run read count	Read length
SRP005953	SRS173806	SRR122237	Catharanthus roseus Normalized Mixed Tissue PE RNA-Seq (CRA_RB)	Little Bright Eyes	CRA_RB	PAIRED - NOMINAL_LENGTH: 402	Illumina Genome Analyzer II	CRA_S_NMT	Normalized Mixed Tissue	28484503	55
	SRS173806	SRR122236	Catharanthus roseus Normalized Mixed Tissue PE RNA-Seq (CRA_RA)		CRA_RA	PAIRED - NOMINAL_LENGTH: 402	Illumina Genome Analyzer II	CRA_S_NMT	Normalized Mixed Tissue	30408302	55
	SRS173806	SRR122238	Catharanthus roseus Normalized Mixed Tissue PE RNA-Seq (CRA_RC)		CRA_RC	PAIRED - NOMINAL_LENGTH: 412	Illumina Genome Analyzer II	CRA_S_NMT	Normalized Mixed Tissue	33303650	120
	SRS173807	SRR122239	Catharanthus roseus Flowers RNA-Seq (CRA_AA)		CRA_AA	SINGLE -	Illumina Genome Analyzer II	CRA_S_AA	Flowers	31645190	35
	SRS173808	SRR122240	Catharanthus roseus Suspension Culture RNA-Seq (CRA_AB)		CRA_AB	SINGLE -	Illumina Genome Analyzer II	CRA_S_AB	YE 0.3 mg/mL for 12h	31770232	35
	SRS173809	SRR122241	Catharanthus roseus Suspension Culture RNA-Seq (CRA_AC)		CRA_AC	SINGLE -	Illumina Genome Analyzer II	CRA_S_AC	YE 0.3 mg/mL for 24h	28040291	35
	SRS173810	SRR122242	Catharanthus roseus Suspension Culture RNA-Seq (CRA_AD)		CRA_AD	SINGLE -	Illumina Genome Analyzer II	CRA_S_AD	YE 0.0 mg/mL for 24h	26234705	35
	SRS173811	SRR122243	Catharanthus roseus Sterile Seedlings RNA-Seq (CRA_AE)		CRA_AE	SINGLE -	Illumina Genome Analyzer II	CRA_S_AE	Sterile seedlings	26797845	35
	SRS173812	SRR122244	Catharanthus roseus Sterile Seedlings RNA-Seq (CRA_AF)		CRA_AF	SINGLE -	Illumina Genome Analyzer II	CRA_S_AF	MJ 6uM 12d	28785703	35
	SRS173813	SRR122245	Catharanthus roseus Sterile Seedlings RNA-Seq (CRA_AG)		CRA_AG	SINGLE -	Illumina Genome Analyzer II	CRA_S_AG	Sterile seedlings	30972803	35
	SRS173814	SRR122246	Catharanthus roseus Suspension Culture RNA-Seq (CRA_AH)		CRA_AH	SINGLE -	Illumina Genome Analyzer II	CRA_S_AH	YE 0.3 mg/mL for 6h	28136359	35
	SRS173815	SRR122247	Catharanthus roseus Suspension Culture RNA-Seq (CRA_AI)		CRA_AI	SINGLE -	Illumina Genome Analyzer II	CRA_S_AI	MJ 100uM 6h	24735776	35
	SRS173816	SRR122248	Catharanthus roseus Suspension Culture RNA-Seq (CRA_AJ)		CRA_AJ	SINGLE -	Illumina Genome Analyzer II	CRA_S_AJ	MJ 100uM 12h	30035758	35
	SRS173817	SRR122249	Catharanthus roseus Suspension Culture RNA-Seq (CRA_AK)		CRA_AK	SINGLE -	Illumina Genome Analyzer II	CRA_S_AK	MJ 100uM 24h	27521830	35
	SRS173818	SRR122250	Catharanthus roseus Suspension Culture RNA-Seq (CRA_AL)		CRA_AL	SINGLE -	Illumina Genome Analyzer II	CRA_S_AL	MJ 100uM 0h	21201403	35
	SRS173819	SRR122251	Catharanthus roseus Mature Leaf RNA-Seq (CRA_AM)		CRA_AM	SINGLE -	Illumina Genome Analyzer II	CRA_S_AM	Mature leaf	25325632	35
	SRS173820	SRR122252	Catharanthus roseus Immature Leaf RNA-Seq (CRA_AN)		CRA_AN	SINGLE -	Illumina Genome Analyzer II	CRA_S_AN	Immature leaf	29918941	35
	SRS173821	SRR122253	Catharanthus roseus Stem RNA-Seq (CRA_AO)		CRA_AO	SINGLE -	Illumina Genome Analyzer II	CRA_S_AO	Stem	28903929	35
	SRS173822	SRR122254	Catharanthus roseus Root RNA-Seq (CRA_AP)		CRA_AP	SINGLE -	Illumina Genome Analyzer II	CRA_S_AP	Root	30896527	35
	SRS173823	SRR122255	Catharanthus roseus Hairy Root (TDCi) RNA-Seq (CRA_AQ)		CRA_AQ	SINGLE -	Illumina Genome Analyzer II	CRA_S_AQ	Hairy Root (TDCi)	22866829	35
	SRS173824	SRR122256	Catharanthus roseus Hairy Root (RebH_F) RNA-Seq (CRA_AR)		CRA_AR	SINGLE -	Illumina Genome Analyzer II	CRA_S_AR	Hairy Root (RebH_F)	22075458	35
	SRS173826	SRR122257	Catharanthus roseus Wild Type Hairy Root RNA-Seq (CRA_AS)		CRA_AS	SINGLE -	Illumina Genome Analyzer II	CRA_S_AS	Hairy Root (Wt)	25316070	35
	SRS173827	SRR122258	Catharanthus roseus Wild Type Hairy Roots RNA-Seq (CRA_AT)		CRA_AT	SINGLE -	Illumina Genome Analyzer II	CRA_S_AT	MJ 250uM for 0h	17032320	35
	SRS173828	SRR122259	Catharanthus roseus Wild Type Hairy Roots RNA-Seq (CRA_AU)		CRA_AU	SINGLE -	Illumina Genome Analyzer II	CRA_S_AU	MJ 250uM for 24h	19183334	35
	SRS173830	SRR122260	Catharanthus roseus Hairy Roots (TDCi) RNA-Seq (CRA_AV)		CRA_AV	SINGLE -	Illumina Genome Analyzer II	CRA_S_AV	MJ 250uM for 0h	20262383	35
	SRS173833	SRR122261	Catharanthus roseus Hairy Roots (TDCi) RNA-Seq (CRA_AW)		CRA_AW	SINGLE -	Illumina Genome Analyzer II	CRA_S_AW	MJ 250uM for 24h	21852088	35
SRP008096	SRS260007	SRR342017	Transcriptome analysis of the Catharanthus roseus leaf.	NA	Library_Illumina_CRO1L1VD_1.1	PAIRED -	Illumina Genome Analyzer II	Illumina_CRO1L1VD	Leaf	37579479	108
	SRS260008	SRR342019	Transcriptome analysis of the Catharanthus roseus leaf.		Library_Illumina_CROLV1VD_1.1	PAIRED -	Illumina Genome Analyzer II	Illumina_CROLV1VD	Leaf	32519413	108
	SRS260009	SRR342022	Transcriptome analysis of the Catharanthus roseus leaf.		Library_Illumina_CROAJ1VD_1.1	PAIRED -	Illumina Genome Analyzer II	Illumina_CROAJ1VD	Leaf	37507020	108
	SRS260010	SRR342023	Transcriptome analysis of the Catharanthus roseus leaf.		Library_Illumina_CROWT1VD_1.1	PAIRED -	Illumina Genome Analyzer II	Illumina_CROWT1VD	Leaf	38830954	108
SRP017832	SRS383671	SRR646572	Catharanthus roseus shoots control	NA	NA	PAIRED - NOMINAL_LENGTH: 100	Illumina HiSeq 2000	C. roseus control shoots	C. roseus control shoots	15380068	100
	SRS383701	SRR646596	Catharanthus roseus shoots 6h MeJA		NA	PAIRED - NOMINAL_LENGTH: 100	Illumina HiSeq 2000	C. roseus shoots 6h MeJA	C. roseus shoots 6h MeJA	11375252	100
	SRS383709	SRR646604	Catharanthus roseus shoots 24h MeJA		NA	PAIRED - NOMINAL_LENGTH: 100	Illumina HiSeq 2000	C. roseus shoots 24h MeJA	C. roseus shoots 24h MeJA	21088704	100
SRP017947	SRS385814	SRR648705	Catharanthus roseus suspension culture control	Morning Mist	NA	PAIRED - NOMINAL_LENGTH: 100	Illumina HiSeq 2000	C. roseus suspension culture control	C. roseus suspension culture control	68021428	100
	SRS385815	SRR648707	Catharanthus roseus suspension culture 24H MeJA		NA	PAIRED - NOMINAL_LENGTH: 100	Illumina HiSeq 2000	C. roseus suspension culture 24h MeJA	C. roseus suspension culture 24h MeJA	37521329	100
SRP026417	SRS454083	SRR924147	C. roseus suspension cells - ORCA2		NA	PAIRED - NOMINAL_LENGTH: 100	Illumina HiSeq 2000	ORCA2	ORCA2 expressing C. roseus suspension cells.	32435737	100
	SRS454084	SRR924148	C. roseus suspension cells - ORCA3		NA	PAIRED - NOMINAL_LENGTH: 100	Illumina HiSeq 2000	ORCA3	C. roseus suspension cells expressing the ORCA3 transcription factor.	35003715	100
SRP035766	SRS543511	SRR1144633	Transcriptome analysis of the leafy flower transition of Catharanthus roseus induced by peanut witches'-boom phytoplasma infection: sample HF	Pacifica Punch Halo	DDS	PAIRED - NOMINAL_LENGTH: 250	Illumina HiSeq 2000	HF	healthy_flowers	13784377	90
	SRS568057	SRR1144634	Transcriptome analysis of the leafy flower transition of Catharanthus roseus induced by peanut witches'-boom phytoplasma infection: sample S4		DDS	PAIRED - NOMINAL_LENGTH: 250	Illumina HiSeq 2000	S4	Stage_4_PnWB_infected_leafy_flowers	13042424	90
SRP041695	SRS602330	SRR1271857	GSM1379558: Leaf	Prabal	NA	PAIRED -	Illumina HiSeq 2000	GSM1379558	Leaf	59158020	100
	SRS602331	SRR1271858	GSM1379559: Root		NA	PAIRED -	Illumina HiSeq 2000	GSM1379559	Root	54987554	100
	SRS602332	SRR1271859	GSM1379560: Flower		NA	PAIRED -	Illumina HiSeq 2000	GSM1379560	Flower	57546161	100
